# Supplementary material for: A Comparison of PBDE Serum Concentrations in Mexican and Mexican-American Children Living in California
Source: PubMed Central journal article supplement (PMC3230428; doi:10.1289/ehp.1002874), 2011-04-15
Supplement: ehp.1002874.s001.pdf [file ehp.1002874.s001.pdf]

**Supplemental Material: A comparison of PBDE serum concentrations in Mexican and Mexican-American children living in California**

Brenda Eskenazi<sup>1</sup>, Laura Fenster<sup>1</sup>, Rosemary Castorina<sup>1</sup>, Amy R. Marks<sup>1</sup>, Andreas Sjödin<sup>2</sup>, Lisa Goldman Rosas<sup>1</sup>, Nina Holland<sup>1</sup>, Armando Garcia Guerra<sup>3</sup>, Lizbeth Lopez-Carillo<sup>3</sup>, Asa Bradman<sup>1</sup>

<sup>1</sup> Center for Children's Environmental Health Research, School of Public Health, University of California, Berkeley, CA

<sup>2</sup> Division of Laboratory Sciences, National Center for Environmental Health, Centers for Disease Control and Prevention, Atlanta, GA,

<sup>3</sup> National Institute of Public Health, Cuernavaca, Mexico

*Please address correspondence to:*

Brenda Eskenazi, Ph.D.

Center for Children's Environmental Health Research

School of Public Health

University of California at Berkeley

1995 University Avenue

Suite 265

Berkeley, California 94602

Supplemental Table 1. Demographic characteristics of CHAMACOS and Proyecto Mariposa mothers and children.

| Characteristic                   | Mariposa<br>n = 283 | CHAMACOS<br>n = 264 | Statistic<br>(p-value)              |
|----------------------------------|---------------------|---------------------|-------------------------------------|
| <b>Mother</b>                    |                     |                     |                                     |
| Education, n(%)                  |                     |                     |                                     |
| ≤ 6th Grade                      | 215 (76.0)          | 118 (44.7)          | X <sup>2</sup> = 79.6<br>(p<0.001)  |
| 7-12 <sup>th</sup> Grade         | 66 (23.3)           | 93 (35.2)           |                                     |
| ≥ Graduate High School           | 2 (0.7)             | 53 (20.1)           |                                     |
| Years in U.S. at Pregnancy, n(%) |                     |                     |                                     |
| ≤1                               |                     | 51 (19.3)           |                                     |
| 2-5                              |                     | 70 (26.5)           |                                     |
| 6-10                             |                     | 75 (28.4)           |                                     |
| ≥11                              |                     | 68 (25.8)           |                                     |
| Parity                           |                     |                     |                                     |
| Yes                              | 39 (13.8)           | 85 (32.2)           | X <sup>2</sup> = 26.4<br>(p <0.001) |
| No                               | 244 (86.2)          | 179 (67.8)          |                                     |
| Age at Delivery, M±SD            | 27.6±6.3            | 26.3±5.1            | X <sup>2</sup> = 7.2<br>(p=0.007)   |
| <b>Child</b>                     |                     |                     |                                     |
| Sex, n(%)                        |                     |                     |                                     |
| Boy                              | 131 (46.3)          | 122 (46.2)          | X <sup>2</sup> = 0.0<br>(p=1.0)     |
| Girl                             | 152 (53.7)          | 142 (53.8)          |                                     |
| Age (years), M±SD                | 5.4±0.3             | 7.1±0.2             | X <sup>2</sup> = 409.0<br>(p<0.001) |
| Child Breastfed (months), M±SD   | 11.3±8.6            | 8.9±8.5             | X <sup>2</sup> = 16.6<br>(p<0.001)  |
| BMI (kg/m <sup>2</sup> ), M±SD*  | 15.6±1.8            | 18.9±3.9            | X <sup>2</sup> = 165.8<br>(p<0.001) |
| BMI (Z-score), M±SD**            | 0.0±1.7             | 1.1±1.0             | X <sup>2</sup> = 120.0<br>(p<0.001) |

\* Age at time of measurements were approximately 5 years for Proyecto Mariposa children and 7 years for CHAMACOS children.

\*\*Adjusted for age and sex, [www.cdc/growthcharts/zscore.htm](http://www.cdc/growthcharts/zscore.htm)
